# Supplementary material for: 3% diquafosol sodium eye drops in Chinese patients with dry eye: a phase IV study
Source: Front Med (Lausanne). 2023 May 25;10:1089613. doi: 10.3389/fmed.2023.1089613 (PMC10249493; doi:10.3389/fmed.2023.1089613)
Supplement: Supplementary file 1 [file Table_1.XLSX]

## Sheet: Center information
Center No	Full address	Full center name
1	Corneal section+Beijing Tongren Hospital,CMU+Beijing+100010+CN-CY	Beijing Tongren Hospital, CMU
1	Corneal section+Beijing Tongren Hospital,CMU+Beijing+100010+CN-CY	Beijing Tongren Hospital, CMU
2	Ophthalmology department+Peking University First Hospital +Beijing+100032+CN-CY	Peking University First Hospital
3	Department of Refractive and corneal Diseases+Eye Center of Tianjin Medical University+Tianjin+300380+CN-CY	Eye Center of Tianjin Medical University
4	Ophthalmology department+The First Affiliated Hospital of Medical School of Zhejiang University+Zhejiang Province Hangzhou City+310000+CN-CY	The First Affiliated Hospital of Medical School of Zhejiang University
5	Eye center+The Second Affiliated Hospital of Medical School of Zhejiang University+Zhejiang Province Hangzhou City+310000+CN-CY	The Second Affiliated Hospital of Medical School of Zhejiang University
6	Ophthalmology department+Xi'an No.1 hospital+Shanxi Province Xi'an City+710002+CN-CY	Xi'an No.1 hospital
7	Ophthalmology department+Nanjing First Hospital +Jiangsu Province Nanjing City+210001+CN-CY	Nanjing First Hospital
8	Ophthalmology department+The 4th People's Hospital of shenyang+Liaoning Province Shenyang City+110031+CN-CY	The 4th People's Hospital of shenyang
9	Ophthalmology department+First Hospital of Jilin University+Jilin Province Changchun City+130012+CN-CY	First Hospital of Jilin University
10	Department of Ophthalmology+Eye & Ent Hospital of Fudan university+Shanghai+200030+CN-CY	Eye & Ent Hospital of Fudan university
11	Ophthalmology department+Xinhua Hospital Affiliated to Shanghai Jiaotong University school of medicine+Shanghai+200092+CN-CY	Xinhua Hospital Affiliated to Shanghai Jiaotong University school of medicine
12	Ophthalmology department+Tongji Hospital Affiliated to Tongji Medical College, Huazhong University of Science and Technology+Hubei Province Wuhan City+430030+CN-CY	Tongji Hospital Affiliated to Tongji Medical College, Huazhong University of Science and Technology
14	Ophthalmology department+West China Hospital，Sichuan University+Sichuan Province Chengdu City+610041+CN-CY	West China Hospital，Sichuan University
15	Ophthalmology department+The forth affiliated hospital of medical school+Liaoning Province Shenyang City+110031+CN-CY	The forth affiliated hospital of medical school
16	Ophthalmology department+Second People's Hospital of Yunnan+Yunnan Province Kunming City+650032+CN-CY	Second People's Hospital of Yunnan
17	Ophthalmology department+the people's hospital of guangxi zhuang autonomous region+Guangxi Zhuang Autonomous Region Nanning City+210008+CN-CY	the people's hospital of guangxi zhuang autonomous region
18	Corneal diseases department	Zhongshan Ophthalmic Center ( ZOC) of Sun Yat-sen University
19	Corneal diseases department	Qingdao eye hospital
20	Department of Ocular surface Diseases	Jinan Second People's Hospital
21	Ophthalmology department	Affiliated hospital of chengde medical university
22	Ophthalmology department	Guangzhou first people's hospital
23	Corneal diseases department	Jinan Second People's Hospital
24	Corneal diseases department	Eye hospital ,WMU,Zhejiang EYE Hospital
26	Department of Keratopathy and ocular surface diseases	Shenzhen Eye Hospital
27	Cataract division department	Shantou international eye center
28	Ophthalmology department	The third people'Hospital of Dalian
30	Ophthalmology department	Xuanwu Hospital Capital Medical University
31	Ophthalmology department	The second hospital of central south university
32	Ophthalmology department	The people'Hospital of leqing
33	Ophthalmology department	Daqing Ophthalmologic Hospital
